# Supplementary material for: Combating selective ionization in the high resolution mass spectral characterization of complex mixtures
Source: Royal Society of Chemistry journal article supplement (doi:10.1039/c9fd00005d), 2019-01-01
Supplement: c9fd00005d1.pdf [file c9fd00005d1.pdf]

## Combating Selective Ionization in the High Resolution Mass Spectral Characterization of Complex Mixtures

Ryan P. Rodgers <sup>a,b,c\*</sup>, Mmilili M. Mapolelo <sup>d</sup>, Winston K. Robbins <sup>b</sup>, Martha L. Chacón-Patiño <sup>a</sup>, Jonathan C. Putman <sup>c</sup>, Sydney F. Niles <sup>c</sup>, Steven M. Rowland <sup>a,b</sup>, and Alan G. Marshall <sup>a,c</sup>

<sup>a</sup>. National High Magnetic Field Laboratory, Florida State University, Tallahassee, FL

<sup>b</sup>. Future Fuels Institute, Florida State University, 1800 East Paul Dirac Drive, Tallahassee, FL

<sup>c</sup>. Department of Chemistry and Biochemistry, Florida State University, Tallahassee, FL

<sup>d</sup>. Botswana Institute for Technology Research and Innovation, Gaborone, Botswana

### Supplemental Information

**Figure S1.** Schematic of the silicic acid separation that produced four (HC, Neutral N, Basic N, and Polars) fractions for subsequent mass spectral characterization.
