# Supplementary figures and images for: Combating selective ionization in the high resolution mass spectral characterization of complex mixtures
Source: Royal Society of Chemistry journal article supplement (doi:10.1039/c9fd00005d), 2019-01-01

**Figure S1**

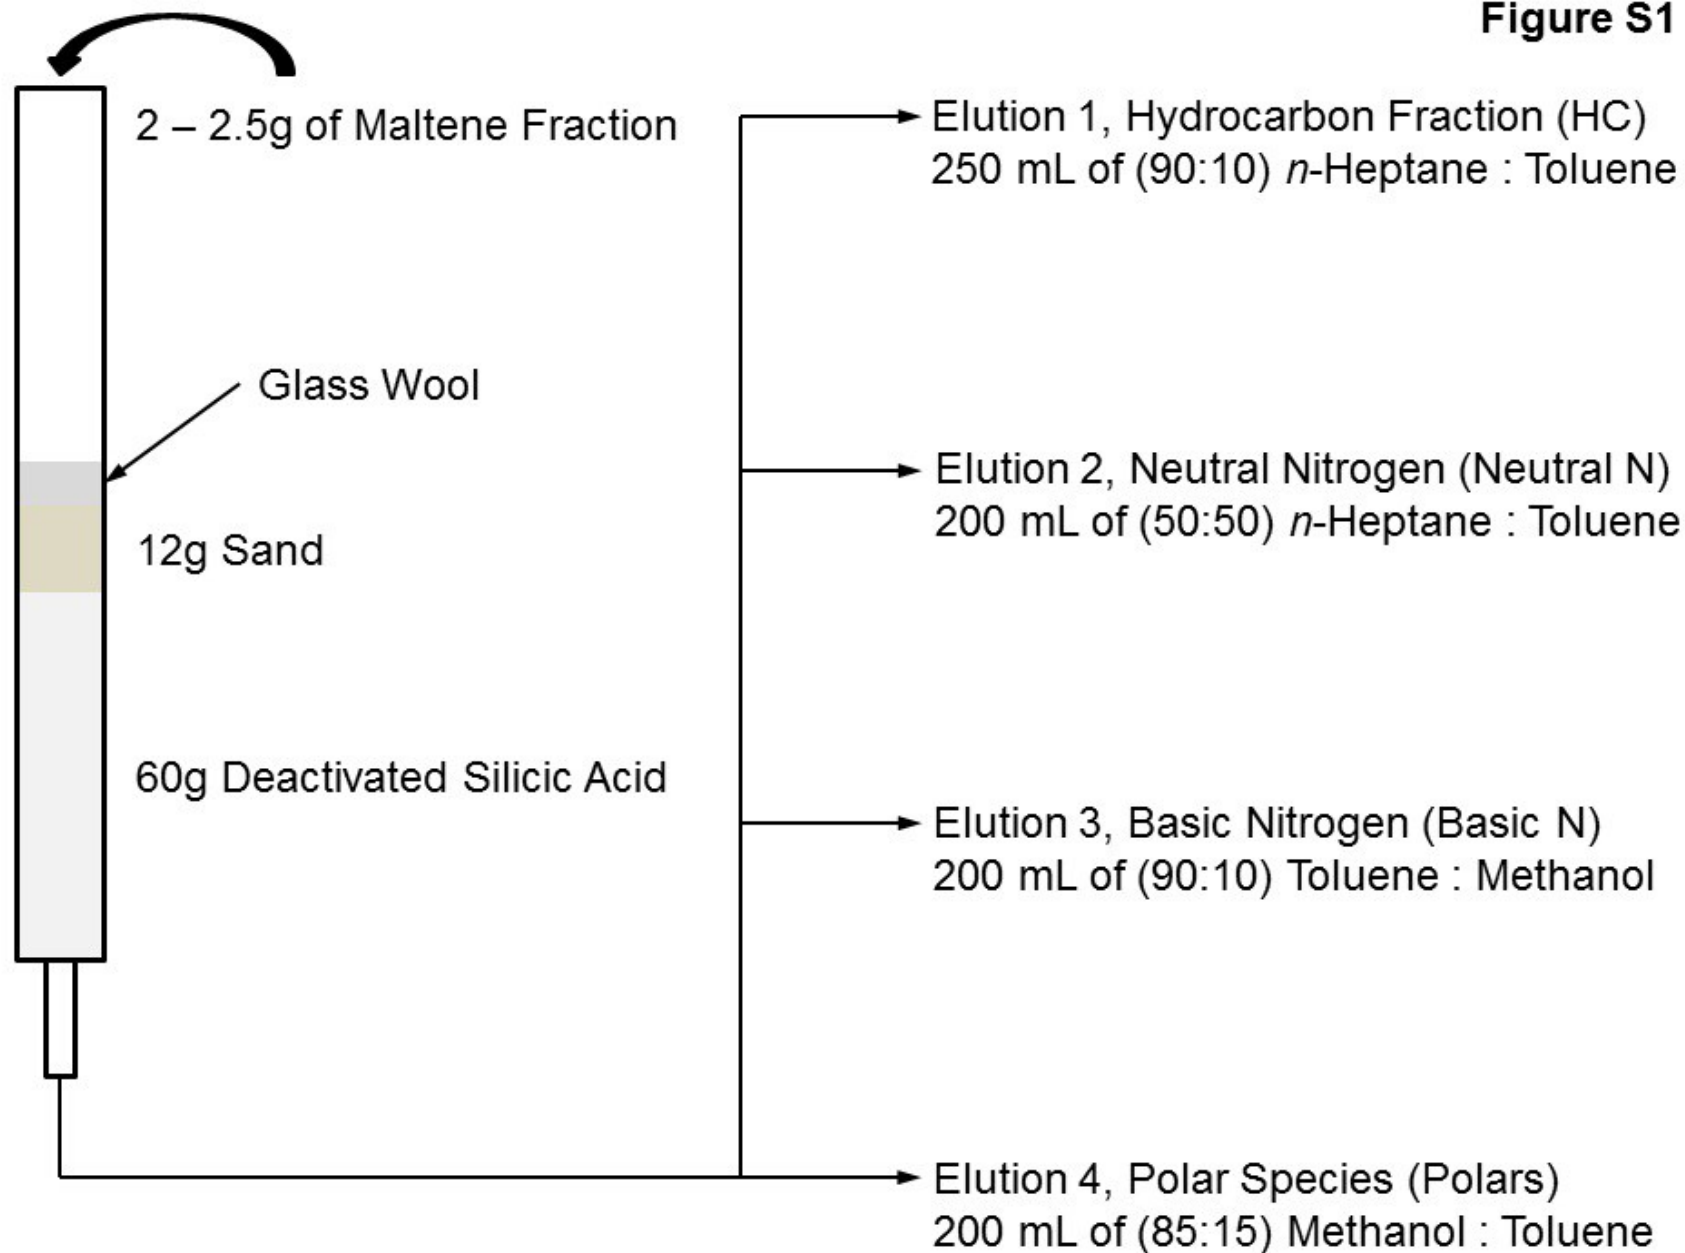

Supplement: c9fd00005d2.pdf [file c9fd00005d2.pdf]
